# Supplementary material for: Incidence and Risk Factors for Acute Kidney Injury during the Treatment of Methicillin-Sensitive Staphylococcus aureus Infections with Cloxacillin Based Antibiotic Regimens: A French Retrospective Study
Source: MDPI journal article supplement (doi:10.3390/jcm10122603), 2021-06-12
Supplement: s1 [file s1]

## Supplementary material

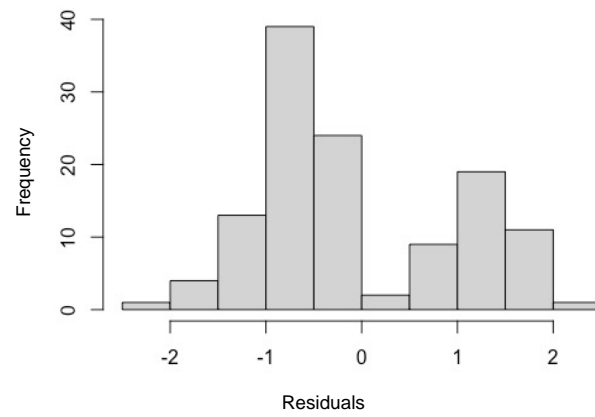

Figure 1. Residuals of the multiple regression. Calibration of the model was good with a Hosmer-Lemeshow chi2 of 9.30 ( $p=0.1575$ ).

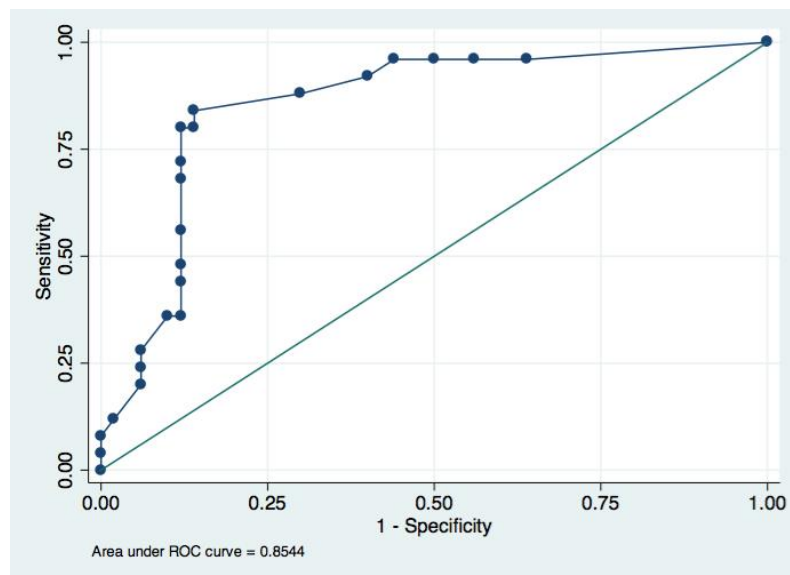

Figure S2. Discrimination of the multiple regression.
